RESEARCH ARTICLE

# Phenotypic and molecular characterization of antimicrobial resistance in *Enterobacter* spp. isolates from companion animals in Japan

Kazuki Harada<sup>1\*</sup>, Takae Shimizu<sup>1</sup>, Yujiro Mukai<sup>2</sup>, Ken Kuwajima<sup>2</sup>, Tomomi Sato<sup>3</sup>, Akari Kajino<sup>3</sup>, Masaru Usui<sup>3</sup>, Yutaka Tamura<sup>3</sup>, Yui Kimura<sup>4</sup>, Tadashi Miyamoto<sup>4</sup>, Yuzo Tsuyuki<sup>5</sup>, Asami Ohki<sup>6</sup>, Yasushi Kataoka<sup>2</sup>

**1** Department of Veterinary Internal Medicine, Tottori University, Tottori, Japan, **2** Laboratory of Veterinary Microbiology, Nippon Veterinary and Life Science University, Tokyo, Japan, **3** Laboratory of Food Microbiology and Food Safety, Rakuno Gakuen University, Hokkaido, Japan, **4** Miyamoto Animal Hospital, Yamaguchi, Japan, **5** Sanritsu Zelkova Veterinary Laboratory, Kanagawa, Japan, **6** Fujifilm Monoris Co., Ltd., Tokyo, Japan

\* [k-harada@muses.tottori-u.ac.jp](mailto:k-harada@muses.tottori-u.ac.jp)

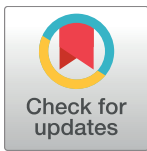

**OPEN ACCESS**

**Citation:** Harada K, Shimizu T, Mukai Y, Kuwajima K, Sato T, Kajino A, et al. (2017) Phenotypic and molecular characterization of antimicrobial resistance in *Enterobacter* spp. isolates from companion animals in Japan. PLoS ONE 12(3): e0174178. <https://doi.org/10.1371/journal.pone.0174178>

**Editor:** Patrick Butaye, Ross University School of Veterinary Medicine, SAINT KITTS AND NEVIS

**Received:** September 23, 2016

**Accepted:** March 4, 2017

**Published:** March 22, 2017

**Copyright:** © 2017 Harada et al. This is an open access article distributed under the terms of the [Creative Commons Attribution License](https://creativecommons.org/licenses/by/4.0/), which permits unrestricted use, distribution, and reproduction in any medium, provided the original author and source are credited.

**Data Availability Statement:** All relevant data are within the paper and its Supporting Information files.

**Funding:** This work was financially supported by JSPS KAKENHI Grant Number 24780299. The Fujifilm Monoris Co., Ltd. provided support in the form of salaries for A.O., but did not have any additional role in the study design, data collection and analysis, decision to publish, or preparation of the manuscript.

## Abstract

The emergence of antimicrobial resistance among *Enterobacter* spp., including resistance to extended-spectrum cephalosporins (ESC), is of great concern in both human and veterinary medicine. In this study, we investigated the prevalence of antimicrobial resistance among 60 isolates of *Enterobacter* spp., including *E. cloacae* (n = 44), *E. aerogenes* (n = 10), and *E. asburiae* (n = 6), from clinical specimens of dogs and cats from 15 prefectures in Japan. Furthermore, we characterized the resistance mechanisms harbored by these isolates, including extended-spectrum  $\beta$ -lactamases (ESBLs) and plasmid-mediated quinolone resistance (PMQR); and assessed the genetic relatedness of ESC-resistant *Enterobacter* spp. strains by multilocus sequence typing (MLST) and pulsed-field gel electrophoresis (PFGE). Antimicrobial susceptibility testing demonstrated the resistance rates to ampicillin (93.3%), amoxicillin-clavulanic acid (93.3%), cefmetazole (93.3%), chloramphenicol (46.7%), ciprofloxacin (43.3%), tetracycline (40.0%), ceftazidime (33.3%), cefotaxime (33.3%), trimethoprim/sulfamethoxazole (28.3%), gentamicin (23.3%), and meropenem (0%). Phenotypic testing detected ESBLs in 16 of 18 ESC-resistant *E. cloacae* isolates but not in the other species. The most frequent ESBL was CTX-M-15 (n = 8), followed by SHV-12 (n = 7), and CTX-M-3 (n = 1). As for AmpC  $\beta$ -lactamases, CMY-2 (n = 2) and DHA-1 (n = 2) were identified in ESC-resistant *E. cloacae* strains with or without ESBLs. All of the ESC-resistant *E. cloacae* strains also harbored one or two PMQRs, including *qnrB* (n = 15), *aac* (6′)-*Ib-cr* (n = 8), and *qnrS* (n = 2). Based on MLST and PFGE analysis, *E. cloacae* clones of ST591-SHV-12, ST171-CTX-M-15, and ST121-CTX-M-15 were detected in one or several hospitals. These results suggested intra- and inter-hospital dissemination of *E. cloacae* clones co-harboring ESBLs and PMQRs among companion animals. This is the first report on the large-scale monitoring of antimicrobial-resistant isolates of *Enterobacter* spp. from companion animals in Japan.

**Competing interests:** KH received the funding of JSPS KAKENHI Grant Number 24780299 (Japan Society for the Promotion of Science; <https://www.jsp.go.jp/j-grantsinaid/>). The funders had no role in study design, data collection and analysis, decision to publish, or preparation of the manuscript. The Fujifilm Monoris Co., Ltd. does not alter our adherence to PLOS ONE policies on sharing data and materials.

## Introduction

Members of the genus *Enterobacter*, belonging to the *Enterobacteriaceae*, are Gram-negative bacilli that inhabit terrestrial and aquatic environments including water, sewage, and soil, as well as the intestinal tracts of mammals [1]. *Enterobacter cloacae* is the most medically-important species in the genus and is responsible for nosocomial infections in humans [2]. In companion animals, this bacterial species is rarely associated with urinary tract infections, wound infections, pneumonia, intravenous catheter site infections, otitis externa, peritonitis, and dermatitis [3].

The emergence of antimicrobial resistance among *Enterobacter* spp. is of great concern worldwide in human medicine [1,2]. It increases the risk of antimicrobial treatment failure not only in humans but also in companion animals. Similarly, the emergence of antimicrobial-resistant bacteria in companion animals may have important human public health consequences if isolates are transmitted to humans from their pets [4,5]. Understanding the prevalence of antimicrobial resistance among *Enterobacter* spp. isolates is thus important both from veterinary medicine and public health perspectives.

Resistance to extended-spectrum cephalosporins (ESC) among Gram-negative bacteria, including *Enterobacter* spp., is of particular concern [6]. In *Enterobacter* spp., ESC resistance is most typically caused by the overproduction of AmpC  $\beta$ -lactamases, which is due to the derepression of a chromosomal gene or the acquisition of a transferable AmpC  $\beta$ -lactamase [1,6]. In addition, extended-spectrum  $\beta$ -lactamases (ESBLs) and carbapenemases have been identified in *Enterobacter* spp. [7], exacerbating the issue of ESC resistance. An even greater concern is that most ESC-resistant *Enterobacteriaceae* exhibit multidrug resistance, including fluoroquinolone resistance, mainly due to chromosomal mutations in the enzymes targeted by the drug, and plasmid-mediated quinolone resistance (PMQR) [8]. In recent years, these resistance mechanisms have been well documented among *Enterobacter* spp. isolates from companion animals across several countries, including Australia [9,10], France [11], and Germany [12]. However, the status of emerging antimicrobial resistance among *Enterobacter* spp. in companion animals remains unknown in many other countries, including Japan.

The aim of the present study was to investigate the prevalence of antimicrobial resistance, and provide molecular characterization of ESC resistance and PMQR among *Enterobacter* spp. isolates from clinical specimens taken from dogs and cats that visited veterinary hospitals throughout Japan. A further aim was to assess the epidemiological relatedness of ESC-resistant *Enterobacter* spp. strains.

## Materials and methods

### Bacterial isolates

A total of 60 clinical isolates of *Enterobacter* spp., consisting of *E. cloacae* (n = 44), *E. aerogenes* (n = 10), and *E. asburiae* (n = 6), were collected from dogs (n = 44) and cats (n = 16) kept by different owners that visited veterinary hospitals between 2003 and 2015. These hospitals were located at the following 15 prefectures in Japan: Hokkaido, Fukui, Gunma, Ibaraki, Saitama, Tokyo, Chiba, Kanagawa, Nagano, Aichi, Osaka, Hyogo, Tottori, Yamaguchi, and Fukuoka prefectures. The specimens were isolated from various anatomical sites, assessed as being sites of bacterial infection by clinical veterinarians, including the urinary tract (n = 27), pus from unspecified locations (n = 10), nasal cavity (n = 5), ear (n = 4), skin (n = 2), eye (n = 2), ascites (n = 2), and the other sites (n = 8). The details of *Enterobacter* spp. isolates used in this study are shown in [S1 Table](#). No information was available regarding previous antimicrobial treatment of the dogs and cats. Ethical approval was not needed according to the ethical guidelines

for epidemiological research by the Japanese government because this study focused on bacterial aspects. Bacterial identification was conducted by assessing the growth status on CHROMagar orientation medium [13], using the API 20E kit (SYSMEX bioMérieux Co., Ltd., Tokyo, Japan), and MALDI-TOF MS with the Bruker MALDI Biotyper system (Bruker Daltonics, Bremen, Germany) [14]. All confirmed *Enterobacter* spp. isolates were stored at  $-80^{\circ}\text{C}$  in 10% skim milk.

### Antimicrobial susceptibility testing

Susceptibilities to ampicillin (AMP, Wako Pure Chemical Industries, Ltd., Osaka, Japan), amoxicillin-clavulanic acid (ACV, Sigma-Aldrich Co. LLC., Tokyo, Japan), cefmetazole (CMZ, Sigma-Aldrich), cefotaxime (CTX, Wako Pure Chemical), ceftazidime (CAZ, Sigma-Aldrich), meropenem (MPM, Wako Pure Chemical), tetracycline (TET, Wako Pure Chemical), gentamicin (GEN, Sigma-Aldrich), chloramphenicol (CHL, Wako Pure Chemical), trimethoprim/sulfamethoxazole (TMS, Wako Pure Chemical), and ciprofloxacin (CIP, Wako Pure Chemical) were determined. Susceptibility testing was conducted using the agar dilution method, according to the Clinical and Laboratory Standards Institute (CLSI) guidelines [15]. The results obtained were interpreted according to the criteria contained within the CLSI guidelines [16,17]. *Escherichia coli* ATCC 25922 was used as a control strain.

### Phenotypic analysis of ESC-resistant *Enterobacter* spp. strains

ESC-resistant [i.e. minimum inhibitory concentration (MIC) for CTX or CAZ of  $\geq 2$  or  $8\ \mu\text{g/mL}$ , respectively] strains were screened for ESBLs by the double-disc synergy test using CTX, CAZ, cefepime, and ACV disks on Mueller-Hinton agar plates without or with  $200\ \mu\text{g/mL}$  cloxacillin [18]. In addition, ESC-resistant isolates without synergism with clavulanate and with inhibition zones augmented upon cloxacillin were classified as organisms overexpressing AmpC  $\beta$ -lactamase [19].

Isolates with an MIC for MPM of  $\geq 0.25\ \mu\text{g/mL}$ , the recommended cut-off value for carbapenemase-producing *Enterobacteriaceae* by the European Committee on Antimicrobial Susceptibility Testing [20], were screened for the production of *Klebsiella pneumoniae* carbapenemase (KPC) and metallo- $\beta$ -lactamase, and porin loss, using a D70C carbapenemase detection set (MASTDISCS™ID, UK).

### Characterization of $\beta$ -lactamase genes and PMQR in ESC-resistant *Enterobacter* spp. isolates

Genomic DNA from each of the isolates was prepared by suspending several colonies in 0.5 mL of water and boiling for 10 min. These samples were used as templates for further genetic analyses. All of the ESC-resistant strains were screened for class A  $\beta$ -lactamase genes (i.e. *bla*-TEM and *bla*SHV), which were identified using PCR and DNA sequencing, as previously reported [21]. Class D  $\beta$ -lactamase genes (*bla*OXA) were detected using multiplex PCR [22], and were amplified and bi-directionally sequenced using specific primers [23]. In addition, AmpC  $\beta$ -lactamase genes (i.e. the ACC, FOX, MOX, DHA, CIT, and EBC groups) were screened by multiplex PCR [24], and were amplified and then bi-directionally sequenced using specific primers [25,26]. In ESBL-positive strains, the CTX-M-type  $\beta$ -lactamase genes were detected using multiplex PCR [27]; for the positive isolates, the genes were amplified and sequenced to identify CTX-M subtypes using group-specific PCR primers [21].

All ESC-resistant isolates were screened for eight PMQR genes (i.e. *qnrA*, *qnrB*, *qnrC*, *qnrD*, *qnrS*, *qepA*, *aac(6')-Ib-cr*, and *oqxAB*) using multiplex PCR [28]. Positive results were

confirmed by individual gene PCRs. Randomly selected PCR products of PMQR genes were directionally sequenced with the same primers for confirmation.

### Multilocus sequence typing and pulsed-field gel electrophoresis of ESC-resistant *E. cloacae* strains

For ESC-resistant *E. cloacae* strains, multilocus sequence typing (MLST) with seven genes (i.e. *dnaA*, *fusA*, *gyrB*, *leuS*, *pyrG*, *rplB*, and *rpoB*) was carried out as described previously [29]. A new sequence type (ST) was submitted to the MLST website and new ST numbers were assigned. The eBURST v3 analysis (<http://eburst.mlst.net/v3/instructions/>) was performed to assess the relatedness between STs.

Pulsed-field gel electrophoresis (PFGE) was performed on ESC-resistant *E. cloacae* strains, as previously described [30]. DNA embedded in agarose was digested with *Xba*I (Takara Bio, Inc., Tokyo, Japan) and then electrophoresed using CHEF DRIII (Bio-Rad, Hercules, CA, USA). PFGE profiles were digitized for analysis using BioNumerics software (version 5.10; Applied Maths, TX, USA). All fragment sizes within the gel were normalized using the molecular weight method. A similarity matrix was calculated using the Dice coefficient, and cluster analysis was performed using the UPGMA algorithm. A cluster was defined based on a similarity cut-off of 80% with 1.0% optimization and 1.0% band tolerance.

## Results

### Rates of antimicrobial resistance among *Enterobacter* spp. isolates

The numbers of isolates with resistance to AMP, ACV, CMZ, CHL, CIP, TET, CAZ, CTX, TMS, GEN, and MPM were 56 (93.3%), 56 (93.3%), 56 (93.3%), 28 (46.7%), 26 (43.3%), 24 (40.0%), 20 (33.3%), 20 (33.3%), 17 (28.3%), 14 (23.3%), and 0 (0%), respectively, in 60 *Enterobacter* spp. clinical isolates (Fig 1).

### Identification of $\beta$ -lactamases and PMQR genes in ESC-resistant *Enterobacter* spp. strains

Resistance to ESC (CTX and CAZ) was detected in 20 isolates, consisting of *E. cloacae* (n = 18) and *E. asburiae* (n = 2). The double-disc synergy test revealed that 16 of 18 ESC-resistant *E. cloacae* strains produced ESBLs, but no *E. asburiae* strains displayed this phenotype. Four non-ESBL-producing ESC-resistant strains were phenotypically identified as AmpC hyperproducers. In total, 16 of 60 (26.7%) *Enterobacter* spp. isolates were positive for ESBLs.

Table 1 shows the detailed characteristics of 20 ESC-resistant *Enterobacter* spp. strains. The CTX-M-15 (n = 8), SHV-12 (n = 7), and CTX-M-3 (n = 1) were detected in ESBL-producing *E. cloacae* strains. As for AmpC  $\beta$ -lactamases, CMY-2 and DHA-1 were detected together with/without ESBLs in two ESC-resistant *E. cloacae* strains each, whereas ACT-type genes were detected in two ESC-resistant *E. asburiae* strains. TEM-1 and OXA-1 were also detected in 13 and 7 ESC-resistant *E. cloacae* strains, respectively. Seven of the ESC-resistant strains had higher MPM MICs (0.25–4  $\mu$ g/mL) than the screening cut-offs for carbapenemase-positive *Enterobacteriaceae* [18]. The results of the disk test indicated that all of the seven strains have porin loss, in addition to ESBLs, but not have carbapenemases. Of the eight PMQR genes tested, *qnrB*, *aac(6')-Ib-cr*, and *qnrS* were detected in 15, 8, and 2 ESC-resistant isolates, respectively.

### MLST typing of ESC-resistant *Enterobacter* spp. strains

As shown in Table 1, 18 ESC-resistant *E. cloacae* isolates investigated by MLST were assigned to eight STs: ST591 (allelic profile 3-3-110-232-19-16-17, n = 7), ST121 (10-21-9-44-45-4-32,

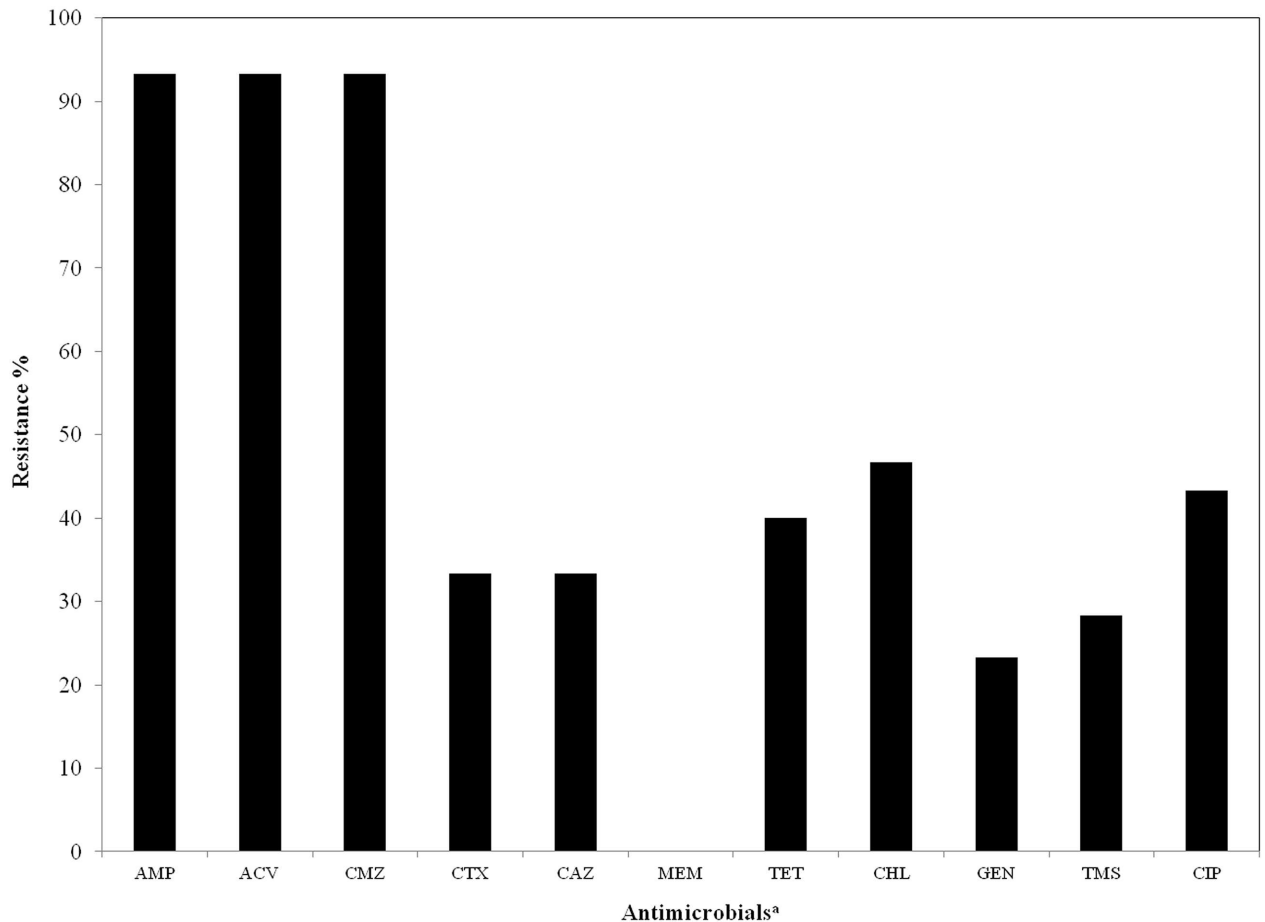

**Fig 1. Rates of resistance to 11 antimicrobials among *Enterobacter* isolates (n = 60) from companion animals.** <sup>a</sup>AMP, ampicillin; ACV, amoxicillin-clavulanic acid; CMZ, cefmetazole; CTX, cefotaxime; CAZ, ceftazidime; MPM, meropenem; TET, tetracycline; GEN, gentamicin; CHL, chloramphenicol; TMS, trimethoprim/sulfamethoxazole; CIP, ciprofloxacin.

<https://doi.org/10.1371/journal.pone.0174178.g001>

n = 3), ST171 (49-21-19-44-45-12-32, n = 3), ST113 (4-22-68-69-37-4-24, n = 1), ST114 (53-35-20-44-45-4-6, n = 1), ST136 (74-21-74-44-45-4-6, n = 1), ST544 (10-21-9-44-45-4-33, n = 1), and ST813 (74-20-20-44-99-24-32, n = 1). Fig 2 illustrates a population snapshot by eBURST analysis of our collection of isolates, against 827 previously-reported STs obtained from the MLST database (accessed on 30 July 2016). Of the eight STs, ST121 and ST544 were included in the same clonal complex, whereas the remaining STs were singletons or had single locus variants that were unrelated to the STs in our collection.

### PFGE analysis of ESC-resistant *Enterobacter* spp. strains

In PFGE analysis, ESC-resistant *E. cloacae* strains formed three distinct clusters (Fig 3). Clusters I and III consisted of three ST121-CTX-M-15 strains and seven ST591-SHV-12 strains, respectively, obtained from the same veterinary hospital. In addition, cluster II contained two ST171-CTX-M-15 strains obtained from the same hospital.

### Discussion

There have been few reports on the prevalence of antimicrobial resistance in overall populations of *Enterobacter* spp. isolates from companion animals worldwide. This study

**Table 1. Characterization of 20 ESC-resistant *Enterobacter* spp. strains from dogs and cats in Japan.**

| Strain                     | Host | ST               | AmpC overexpression | ESBL/ AmpC      | Other β-lactamase | PMQR                       | MIC(μg/mL) <sup>b</sup> |      |      |     |       |      |      |     |             |     |
|----------------------------|------|------------------|---------------------|-----------------|-------------------|----------------------------|-------------------------|------|------|-----|-------|------|------|-----|-------------|-----|
|                            |      |                  |                     |                 |                   |                            | ACV                     | CMZ  | CTX  | CAZ | MPM   | TET  | CHL  | GEN | TMS         | CIP |
| <i>E. cloacae</i> (n = 18) |      |                  |                     |                 |                   |                            |                         |      |      |     |       |      |      |     |             |     |
| EN13                       | Dog  | 113              | +                   | Not detected    | TEM-1             | <i>qnrS</i>                | 64/32                   | 256  | 64   | 32  | 0.125 | 256  | >256 | 0.5 | >64/1216    | 16  |
| EN41                       | Dog  | 114              | -                   | CTX-M-15        | OXA-1             | <i>aac(6′)-Ib-cr, qnrB</i> | 64/32                   | >256 | 256  | 32  | 0.06  | 8    | 32   | 32  | >64/1216    | 128 |
| EN33                       | Dog  | 121              | -                   | CTX-M-15        | TEM-1, OXA-1      | <i>aac(6′)-Ib-cr, qnrB</i> | 64/32                   | 128  | >256 | 64  | 0.125 | 64   | 256  | 16  | >64/1216    | 64  |
| EN72                       | Dog  | 121              | -                   | CTX-M-15        | OXA-1             | <i>aac(6′)-Ib-cr, qnrB</i> | 128/64                  | 256  | >256 | 32  | 0.03  | 32   | >256 | 16  | >64/1216    | >32 |
| EN73                       | Dog  | 121              | -                   | CTX-M-15        | OXA-1             | <i>aac(6′)-Ib-cr, qnrB</i> | 64/32                   | 256  | >256 | 32  | 0.03  | 32   | >256 | 16  | >64/1216    | >32 |
| EN28                       | Dog  | 136              | -                   | CTX-M-15, CMY-2 | TEM-1, OXA-1      | <i>aac(6′)-Ib-cr, qnrB</i> | 64/32                   | 256  | >256 | 256 | 0.06  | 64   | 256  | 0.5 | >64/1216    | 128 |
| EN59                       | Dog  | 171              | -                   | CTX-M-15        | TEM-1, OXA-1      | <i>aac(6′)-Ib-cr</i>       | 64/32                   | 64   | >256 | 32  | 0.06  | 32   | 256  | 1   | >64/1216    | 8   |
| EN63                       | Dog  | 171              | -                   | CTX-M-15, DHA-1 | Not detected      | <i>aac(6′)-Ib-cr, qnrB</i> | 64/32                   | 128  | 256  | 64  | 0.03  | 64   | 256  | 128 | >64/1216    | 64  |
| EN66                       | Dog  | 171              | -                   | CTX-M-15        | TEM-1, OXA-1      | <i>aac(6′)-Ib-cr, qnrB</i> | 64/32                   | 64   | >256 | 128 | 0.125 | 32   | 256  | 32  | >64/1216    | 64  |
| EN60                       | Dog  | 544              | +                   | DHA-1           | Not detected      | <i>qnrB</i>                | 64/32                   | 256  | 32   | 32  | 0.06  | 8    | 32   | 128 | 1/19        | 2   |
| EN3                        | Dog  | 591              | -                   | SHV-12          | TEM-1             | <i>qnrB</i>                | 64/32                   | >256 | 64   | 128 | 0.25  | 256  | >256 | 256 | 0.5/9.5     | 64  |
| EN4                        | Dog  | 591              | -                   | SHV-12          | TEM-1             | <i>qnrB</i>                | 64/32                   | >256 | 64   | 128 | 0.25  | 256  | >256 | 128 | 0.5/9.5     | 64  |
| EN5                        | Dog  | 591              | -                   | SHV-12          | TEM-1             | <i>qnrB</i>                | 64/32                   | >256 | 64   | 256 | 2     | 256  | >256 | 256 | 0.5/9.5     | 64  |
| EN7                        | Cat  | 591              | -                   | SHV-12, CMY-2   | TEM-1             | <i>qnrB</i>                | 128/64                  | >256 | 256  | 256 | 4     | 256  | >256 | 128 | 1/19        | 64  |
| EN10                       | Dog  | 591              | -                   | SHV-12          | TEM-1             | <i>qnrB</i>                | 64/32                   | >256 | 128  | 128 | 1     | >256 | >256 | 64  | 1/19        | 64  |
| EN12                       | Dog  | 591              | -                   | SHV-12          | TEM-1             | <i>qnrB</i>                | 64/32                   | >256 | 128  | 256 | 1     | 256  | >256 | 64  | 1/19        | 64  |
| EN14                       | Cat  | 591              | -                   | SHV-12          | TEM-1             | <i>qnrB</i>                | 64/32                   | >256 | 32   | 128 | 0.25  | 256  | >256 | 128 | 1/19        | 128 |
| EN53                       | Cat  | 813 <sup>a</sup> | -                   | CTX-M-3         | TEM-1             | <i>qnrS</i>                | 64/32                   | 128  | 256  | 4   | 0.06  | 256  | >256 | 128 | >64/1216    | 0.5 |
| <i>E. asburiae</i> (n = 2) |      |                  |                     |                 |                   |                            |                         |      |      |     |       |      |      |     |             |     |
| EN6                        | Dog  | -                | +                   | ACT-8           | Not detected      | Not detected               | 128/64                  | >256 | 16   | 32  | 0.03  | 1    | 8    | 0.5 | 0.125/2.375 | 4   |
| EN20                       | Dog  | -                | +                   | ACT-3           | Not detected      | Not detected               | 64/32                   | 256  | 64   | 64  | 0.125 | 2    | 32   | 2   | 2/38        | 16  |

<sup>a</sup> New ST.

<sup>b</sup> ACV, amoxicillin-clavulanic acid; CMZ, cefmetazole; CTX, cefotaxime; MPM, meropenem; TET, tetracycline; GEN, gentamicin; CHL, chloramphenicol; TMS, trimethoprim/sulfamethoxazole; CIP, ciprofloxacin. The MIC values of ampicillin were >256 μg/mL in all ESC-resistant *Enterobacter* spp. strains.

<https://doi.org/10.1371/journal.pone.0174178.t001>

demonstrated that almost all *Enterobacter* spp. isolates in our collection exhibited resistance to β-lactams excluding AMP, ACV, and CMZ, possibly due to chromosomal AmpC β-lactamases [1,2]. The rates of resistance to CTX and CIP in our collection (33.3% and 43.3%, respectively) were similar to those in *K. pneumoniae* isolates (39.3% and 41.6%, respectively) [31], but were



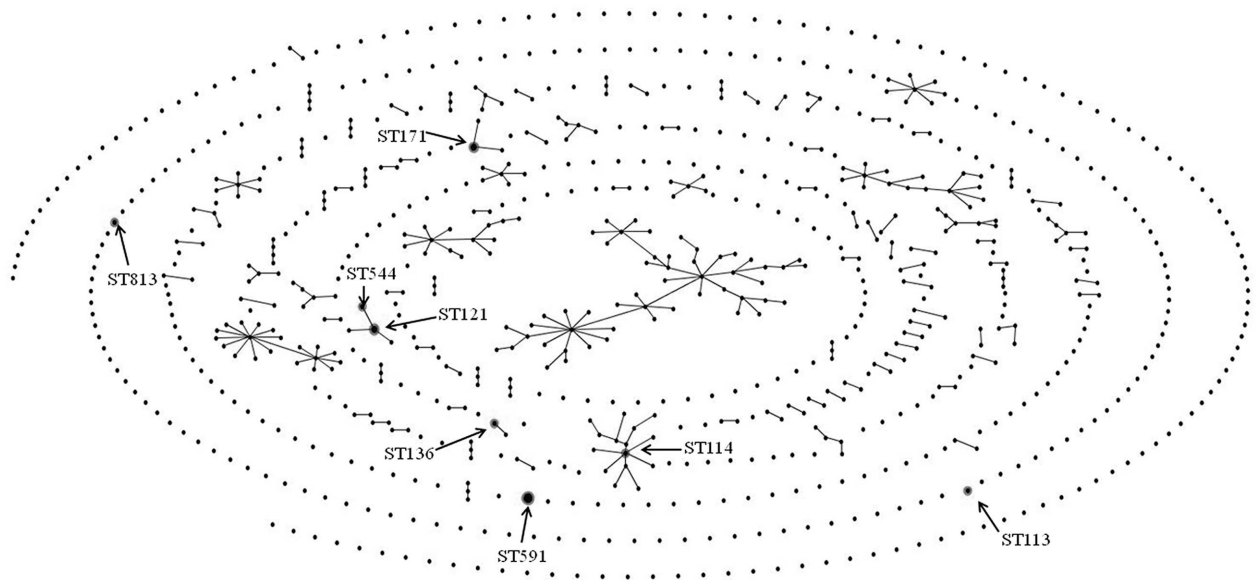

**Fig 2. Population snapshot by eBURST analysis of ESC-resistant *E. cloacae* strains against the entire *E. cloacae* MLST database.** \*The STs identified in this study are labeled with arrows. The names of the clonal complexes are based on the ST assigned as the founder genotype. The relative size of the circles indicates the prevalence of STs and lines between STs connect single locus variants.

<https://doi.org/10.1371/journal.pone.0174178.g002>

much higher than those in *Proteus mirabilis* isolates (1.9% and 5.8%, respectively) [32] from companion animals in Japan. Compared with *Enterobacter* spp. isolates from human in Japan [33], the rate of CIP resistance in our collection was extremely high (4.4% vs. 43.3%). Similarly, a higher rate of CIP resistance than human isolates has been reported in *E. coli* [34] and *K.*

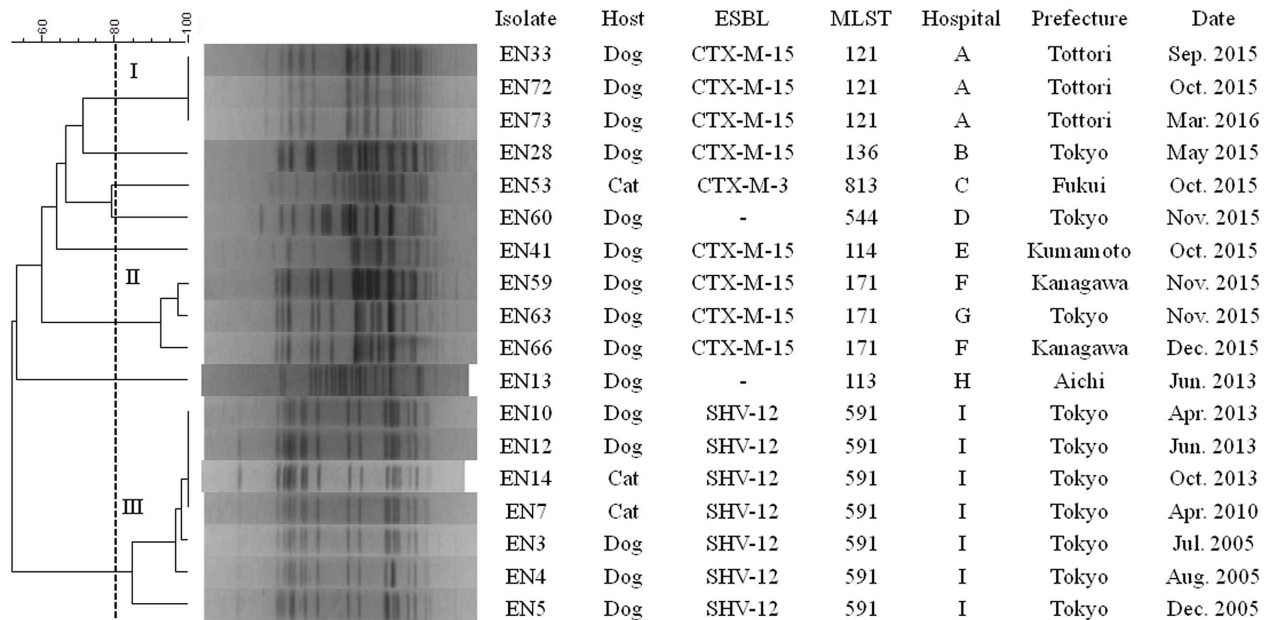

**Fig 3. PFGE profiles of 18 ESC-resistant *E. cloacae* strains from companion animals in Japan.** \*The numbers embedded in the phylogenetic tree indicate clusters.

<https://doi.org/10.1371/journal.pone.0174178.g003>

*pneumoniae* [31] isolates from companion animals. These findings implied the heavy use of fluoroquinolone drugs in veterinary medicine. To evaluate inter-country diversity of the prevalence of antimicrobial-resistant *Enterobacter* spp. from companion animals, systematic surveillance would be needed in many countries.

We found higher prevalence of ESBLs in *Enterobacter* isolates (16/60, 26.7%), compared with that reported from dogs (11/314, 3.5%) and cats (11/108, 10.2%) in France [11] and human isolates in Japan (22/364, 6.0%) [35]. In addition, the carriage rate of ESBLs in our collection was slightly lower than that in *K. pneumoniae* isolates (31/89, 34.8%) [31], but was much higher than that in *P. mirabilis* isolates (0/103, 0%) [32] from companion animals in Japan. These data suggest that the risk of ESBL carriage is relatively high in *Enterobacter* spp. isolates from companion animals in Japan. In this study, the major types of ESBLs were CTX-M-15 and SHV-12. Similarly, these ESBLs have been frequently detected in companion animals in France and Australia [9,11]. As for ESBLs detected in human strains in Japan, CTX-M-3, which was an uncommon ESBL in this study ( $n = 1$ ), was predominant, whereas CTX-M-15 was not detected [35]. These data suggest that the major types of ESBLs differ between *Enterobacter* spp. isolates from companion animals and human. Therefore, the risk of zoonotic transmission of ESBL-producing *Enterobacter* spp. is not likely to be high, although attention should be paid to *Enterobacter* spp. isolates from companion animals as reservoirs of ESBLs.

Besides ESBLs, we identified several AmpC  $\beta$ -lactamase genes (ACT, CMY, and DHA-type genes) in ESC-resistant strains. Notably, ACT-type enzymes are known to be representative chromosomal AmpC  $\beta$ -lactamases of *Enterobacter* spp. [36]. As for ACT-type genes, two *E. asburiae* strains were positive, but all of the *E. cloacae* strains were negative, which might imply the lack of AmpC genes or sequence variability among chromosomal AmpC genes, as previously reported [37]. The remaining two types of plasmid-mediated AmpC  $\beta$ -lactamases have rarely been identified in *Enterobacter* spp. isolated from humans [38,39]. We also found that several non-ESBL-producing ESC-resistant strains overexpressed chromosomal AmpC  $\beta$ -lactamase. Our findings suggest that plasmid-mediated AmpC  $\beta$ -lactamases, in addition to chromosomal AmpC  $\beta$ -lactamases, partly contribute to ESC resistance in *Enterobacter* spp. isolates from companion animals. On the other hand, all ESC-resistant *Enterobacter* spp. strains were negative for carbapenemases. This finding indicates that carbapenemases are uncommon among *Enterobacter* spp. isolates from companion animals in Japan, as well as among other Gram-negative bacteria [31,32,40,41], although they have been reported among animal isolates in other countries [12] and among human isolates in Japan [42].

All of the ESC-resistant *E. cloacae* strains possessed one or more PMQR genes, which is likely to contribute to the extremely high rate of CIP resistance among these strains (18/20, 90.0%). We found the high prevalence of *qnrB* and *aac(6')-Ib-cr* among ESC-resistant *Enterobacter* strains, and similar findings have been confirmed among *Enterobacter* isolates from companion animals in Australia [10]. Notably, most *aac(6')-Ib-cr*-positive strains also harbored OXA-1 and/or CTX-M-15  $\beta$ -lactamases, which may indicate a strong association between these genes [43,44]. In addition, we detected the *qnrS* gene, which is the most prevalent PMQR gene among ESBL-producing *Enterobacter* spp. isolates from humans in Japan [35] but was not previously detected among isolates from companion animals in Australia [10]. These findings may suggest that *qnrS* gene is locally spread among companion animals and humans in Japan.

Recently, Izdebski *et al.* [19] found that ST66, ST78, ST108, and ST114 strains were widely spread as high-risk international clones of ESC-resistant *E. cloacae*. Of these STs, ST114 was identified in our collection and was associated with CTX-M-15. This is the first report of the ST114-CTX-M-15 clone in companion animals in any country other than France [11]. Furthermore, we found eight STs that had not been identified in the study by Haenni *et al.* [11].



This implies that ESC-resistant *E. cloacae* isolated from different countries generally belong to different lineages. Unfortunately, the prevalence of STs has not been reported for human ESC-resistant *E. cloacae* isolates in Japan, and thus further studies to compare STs between animal and human isolates are needed.

Based on the PFGE analysis, we found that ESBL-producing *E. cloacae* clones were disseminated among different patients in the same hospital. This result strongly suggests nosocomial infections of ESBL-producing *E. cloacae* clones, and similar findings have previously been reported [11]. Surprisingly, several clones were repeatedly identified at an interval of many months, implying that ESBL-producing *E. cloacae* clones can survive inside or outside of hospitals for a long period [45]. Therefore, the dissemination of ESBL-producing *E. cloacae* clones among companion animals may occur not only via direct spread from animal to animal, but also via indirect transmission from potential reservoirs and sources in the environment. Our data emphasize the need for infection control in hospitals and in the community to prevent dissemination of ESBL-producing *E. cloacae* clones among companion animals.

## Conclusion

Our data demonstrate the high prevalence of ESBLs and PMQR genes among ESC-resistant *E. cloacae* strains isolated from companion animals in Japan. Epidemiological data suggest that *E. cloacae* clones co-harboring ESBLs and PMQR genes are disseminated via intra-hospital and inter-hospital transmission.

## Supporting information

**S1 Table. The details of *Enterobacter* spp. isolates used in this study.** \* AMP, ampicillin; ACV, amoxicillin-clavulanic acid; CMZ, cefmetazole; CTX, cefotaxime; CAZ, ceftazidime, MPM, meropenem; TET, tetracycline; GEN, gentamicin; CHL, chloramphenicol; TMS, trimethoprim/sulfamethoxazole; CIP, ciprofloxacin; R, resistant.  
(XLS)

## Acknowledgments

We thank the team of curators of the Institut Pasteur MLST and whole genome MLST databases for curating the data and making them publicly available at <http://bigsd.b.pasteur.fr/>

## Author Contributions

**Conceptualization:** KH.

**Data curation:** KH.

**Funding acquisition:** KH.

**Investigation:** KH T. Shimizu YM KK AK T. Sato MU Y. Tamura.

**Project administration:** KH.

**Resources:** Y. Kimura TM Y. Tsuyuki AO Y. Kataoka.

**Supervision:** KH.

**Writing – original draft:** KH.

**Writing – review & editing:** MU Y. Tamura.

## References

1. Davin-Regli A, Pagès JM. *Enterobacter aerogenes* and *Enterobacter cloacae*: versatile bacterial pathogens confronting antibiotic treatment. *Front Microbiol*. 2015; 6: Article 392. <https://doi.org/10.3389/fmicb.2015.00392> PMID: 26042091
2. Mezzatesta ML, Gona F, Stefani S. *Enterobacter cloacae* complex: clinical impact and emerging antibiotic resistance. *Future Microbiol*. 2012; 7: 887–902. <https://doi.org/10.2217/fmb.12.61> PMID: 22827309
3. Weese JS. Investigation of *Enterobacter cloacae* infections at a small animal veterinary teaching hospital. *Vet Microbiol*. 2008; 130: 426–428. <https://doi.org/10.1016/j.vetmic.2008.02.009> PMID: 18374521
4. Guardabassi L, Schwarz S, Lloyd DH. Pet animals as reservoirs of antimicrobial-resistant bacteria. *J Antimicrob Chemother*. 2004; 54: 321–332. <https://doi.org/10.1093/jac/dkh332> PMID: 15254022
5. Lloyd DH. Reservoirs of antimicrobial resistance in pet animals. *Clin Infect Dis*. 2007; 45: S148–152. <https://doi.org/10.1086/519254> PMID: 17683019
6. Paterson DL. Resistance in gram-negative bacteria: *Enterobacteriaceae*. *Am J Infect Control* 2006; 34: S20–28. <https://doi.org/10.1016/j.ajic.2006.05.238> PMID: 16813978
7. Bush K. Alarming  $\beta$ -lactamase-mediated resistance in multidrug-resistant *Enterobacteriaceae*. *Curr Opin Microbiol*. 2010; 13: 558–564. <https://doi.org/10.1016/j.mib.2010.09.006> PMID: 20920882
8. Delgado-Valverde M, Sojo-Dorado J, Pascual A, Rodríguez-Baño J. Clinical management of infections caused by multidrug-resistant *Enterobacteriaceae*. *Ther Adv Infect Dis*. 2013; 1: 49–69. <https://doi.org/10.1177/2049936113476284> PMID: 25165544
9. Sidjabat HE, Hanson ND, Smith-Moland E, Bell JM, Gibson JS, Filippich LJ, et al. Identification of plasmid-mediated extended-spectrum and AmpC  $\beta$ -lactamases in *Enterobacter* spp. isolated from dogs. *J Med Microbiol*. 2007; 56: 426–434. <https://doi.org/10.1099/jmm.0.46888-0> PMID: 17314376
10. Gibson JS, Cobbold RN, Heisig P, Sidjabat HE, Kyaw-Tanner MT, Trott DJ. Identification of Qnr and AAC(6')-1b-cr plasmid-mediated fluoroquinolone resistance determinants in multidrug-resistant *Enterobacter* spp. isolated from extraintestinal infections in companion animals. *Vet Microbiol*. 2010; 143: 329–336. <https://doi.org/10.1016/j.vetmic.2009.11.031> PMID: 20036084
11. Haenni M, Saras E, Ponsin C, Dahmen S, Petitjean M, Hocquet D, et al. High prevalence of international ESBL CTX-M-15-producing *Enterobacter cloacae* ST114 clone in animals. *J Antimicrob Chemother*. 2016; 71: 1497–1500. <https://doi.org/10.1093/jac/dkw006> PMID: 26850718
12. Schmiedel J, Falgenhauer L, Domann E, Bauerfeind R, Prenger-Berninghoff E, Imirzalioglu C, et al. Multiresistant extended-spectrum  $\beta$ -lactamase-producing *Enterobacteriaceae* from humans, companion animals and horses in central Hesse, Germany. *BMC Microbiol*. 2014; 14: 187. <https://doi.org/10.1186/1471-2180-14-187> PMID: 25014994
13. Ohkusu K. Cost-effective and rapid presumptive identification of gram-negative bacilli in routine urine, pus and stool culture: Evaluation of the use of CHROMagar orientation medium in conjunction with biochemical tests. *J Clin Microbiol*. 2000; 38: 4586–4592. PMID: 11101600
14. Dierig A, Frei R, Egli A. The fast route to microbe identification: matrix assisted laser desorption/ionization-time of flight mass spectrometry (MALDI-TOF-MS). *Pediatr Infect Dis J*. 2015; 34: 97–99. <https://doi.org/10.1097/INF.0000000000000601> PMID: 25741802
15. Clinical and Laboratory Standards Institute. Performance Standards for Antimicrobial Disk and Dilution Susceptibility Tests for Bacteria Isolated From Animals. Approved Standard-Fourth Edition. CLSI document VET01-A4, Wayne, PA., USA. 2013.
16. Clinical and Laboratory Standards Institute. Performance Standards for Antimicrobial Disk and Dilution Susceptibility Tests for Bacteria Isolated From Animals. Second Informational Supplement. CLSI document VET01-S2, Wayne, PA., USA. 2013.
17. Clinical and Laboratory Standards Institute. Performance Standards for Antimicrobial Susceptibility Testing; Twentieth Informational Supplement. CLSI document M100-S20, Wayne, PA., USA. 2010.
18. EUCAST. EUCAST Guidelines for Detection of Resistance Mechanisms and Specific Resistances of Clinical and/or Epidemiological Importance. 2013. [http://www.eucast.org/fileadmin/src/media/PDFs/EUCAST\\_files/Resistance\\_mechanisms/EUCAST\\_detection\\_of\\_resistance\\_mechanisms\\_v1.0\\_20131211.pdf](http://www.eucast.org/fileadmin/src/media/PDFs/EUCAST_files/Resistance_mechanisms/EUCAST_detection_of_resistance_mechanisms_v1.0_20131211.pdf).
19. Izdebski R, Baraniak A, Herda M, Fietz J, Bonten MJ, Carmeli Y, et al. MLST reveals potentially high-risk international clones of *Enterobacter cloacae*. *J Antimicrob Chemother*. 2015; 70: 48–56. <https://doi.org/10.1093/jac/dku359> PMID: 25216820
20. Hrabák J, Chudáčková E, Papagiannitsis CC. Detection of carbapenemases in *Enterobacteriaceae*: a challenge for diagnostic microbiological laboratories. *Clin Microbiol Infect*. 2014; 20: 839–853. <https://doi.org/10.1111/1469-0691.12678> PMID: 24813781

21. Kojima A, Ishii Y, Ishihara K, Esaki H, Asai T, Oda C, et al. Extended-spectrum- $\beta$ -lactamase-producing *Escherichia coli* strains isolated from farm animals from 1999 to 2002: report from the Japanese Veterinary Antimicrobial Resistance Monitoring Program. *Antimicrob Agents Chemother.* 2005; 49: 3533–3537. <https://doi.org/10.1128/AAC.49.8.3533-3537.2005> PMID: 16048977
22. Voets GM, Fluit AC, Scharringa J, Cohen Stuart J, Leverstein-van Hall MA. A set of multiplex PCRs for genotypic detection of extended-spectrum  $\beta$ -lactamases, carbapenemases, plasmid-mediated AmpC  $\beta$ -lactamases and OXA  $\beta$ -lactamases. *Int J Antimicrob Agents* 2011; 37: 356–359. <https://doi.org/10.1016/j.ijantimicag.2011.01.005> PMID: 21353487
23. Steward CD, Rasheed JK, Hubert SK, Biddle JW, Raney PM, Anderson GJ, et al. Characterization of clinical isolates of *Klebsiella pneumoniae* from 19 laboratories using the National Committee for Clinical Laboratory Standards extended-spectrum  $\beta$ -lactamase detection methods. *J Clin Microbiol.* 2001; 39: 2864–2872. <https://doi.org/10.1128/JCM.39.8.2864-2872.2001> PMID: 11474005
24. Pérez-Pérez FJ, Hanson ND. Detection of plasmid-mediated AmpC  $\beta$ -lactamase genes in clinical isolates by using multiplex-PCR. *J Clin Microbiol.* 2002; 40: 2153–2162. <https://doi.org/10.1128/JCM.40.6.2153-2162.2002> PMID: 12037080
25. Yan JJ, Ko WC, Jung YC, Chuang CL, Wu JJ. Emergence of *Klebsiella pneumoniae* isolates producing inducible DHA-1  $\beta$ -lactamase in a university hospital in Taiwan. *J Clin Microbiol.* 2002; 40: 3121–3126. <https://doi.org/10.1128/JCM.40.9.3121-3126.2002> PMID: 12202541
26. Kim J, Lim YM, Rheem I, Lee Y, Lee JC, Seol SY, et al. CTX-M and SHV-12  $\beta$ -lactamases are the most common extended-spectrum enzymes in clinical isolates of *Escherichia coli* and *Klebsiella pneumoniae* collected from 3 university hospitals within Korea. *FEMS Microbiol Lett.* 2005; 245: 93–98. <https://doi.org/10.1016/j.femsle.2005.02.029> PMID: 15796985
27. Xu L, Ensor V, Gossain S, Nye K, Hawkey P. Rapid and simple detection of *bla*<sub>CTX-M</sub> genes by multiplex PCR assay. *J Med Microbiol.* 2007; 54: 1183–1187.
28. Ciesielczuk H, Hornsey M, Choi V, Woodford N, Wareham DW. Development and evaluation of a multiplex PCR for eight plasmid-mediated quinolone-resistance determinants. *J Med Microbiol.* 2013; 62: 1823–1827. <https://doi.org/10.1099/jmm.0.064428-0> PMID: 24000223
29. Miyoshi-Akiyama T, Hayakawa K, Ohmagari N, Shimojima M, Kirikae T. Multilocus sequence typing (MLST) for characterization of *Enterobacter cloacae*. *PLoS One* 2013; 8: e66358. <https://doi.org/10.1371/journal.pone.0066358> PMID: 23776664
30. Herschleb J, Ananiev G, Schwartz DC. Pulsed-field gel electrophoresis. *Nat Protoc.* 2007; 2: 677–684. <https://doi.org/10.1038/nprot.2007.94> PMID: 17406630
31. Harada K, Shimizu T, Mukai Y, Kuwajima K, Sato T, Usui M, et al. Phenotypic and molecular characterization of antimicrobial resistance in *Klebsiella* spp. isolates from companion animals in Japan: Clonal dissemination of multidrug-resistant extended-spectrum  $\beta$ -lactamase-producing *Klebsiella pneumoniae*. *Front Microbiol.* 2016; 7: 1021. <https://doi.org/10.3389/fmicb.2016.01021> PMID: 27446056
32. Harada K, Niina A, Shimizu T, Mukai Y, Kuwajima K, Miyamoto T, et al. Phenotypic and molecular characterization of antimicrobial resistance in *Proteus mirabilis* isolates from dogs. *J Med Microbiol.* 2014; 63: 1561–1567. <https://doi.org/10.1099/jmm.0.081539-0> PMID: 25187600
33. Yamaguchi K, Ohno A, Ishii Y, Tateda K, Iwata M, Akizawa K, et al. In vitro susceptibilities to levofloxacin and various antibacterial agents of 12,866 clinical isolates obtained from 72 centers in 2010. *Jpn J Antibiotic.* 2012; 65: 181–206.
34. Harada K, Niina A, Nakai Y, Kataoka Y, Takahashi T. Prevalence of antimicrobial resistance in relation to virulence genes and phylogenetic origins among urogenital *Escherichia coli* isolates from dogs and cats in Japan. *Am J Vet Res.* 2012; 73: 409–417. <https://doi.org/10.2460/ajvr.73.3.409> PMID: 22369535
35. Kanamori H, Yano H, Hirakata Y, Hirotsu A, Arai K, Endo S, et al. Molecular characteristics of extended-spectrum beta-lactamases and *qnr* determinants in *Enterobacter* species from Japan. *PLoS One* 2012; 7: e37967. <https://doi.org/10.1371/journal.pone.0037967> PMID: 22719857
36. Mohd Khari FI, Karunakaran R, Rosli R, Tee Tay S. Genotypic and phenotypic detection of AmpC  $\beta$ -lactamases in *Enterobacter* spp. isolated from a teaching hospital in Malaysia. *PLoS One* 2016; 11: e0150643. <https://doi.org/10.1371/journal.pone.0150643> PMID: 26963619
37. Conceição T, Faria N, Lito L, Melo Cristino J, Salgado MJ, Duarte A. Diversity of chromosomal AmpC  $\beta$ -lactamases from *Enterobacter cloacae* isolates in a Portuguese hospital. *FEMS Microbiol Lett.* 2004; 230: 197–202. PMID: 14757240
38. Sheng WH, Badal RE, Hsueh RR; SMART Program. Distribution of extended-spectrum  $\beta$ -lactamases, AmpC- $\beta$ -lactamases, and carbapenemases among *Enterobacteriaceae* isolates causing intra-abdominal infections in the Asia-Pacific region: results of the study for Monitoring Antimicrobial Resistance Trends (SMART). *Antimicrob Agents Chemother.* 2013; 57: 2981–2988. <https://doi.org/10.1128/AAC.00971-12> PMID: 23587958

39. Souna D, Amir AS, Bekhoucha SN, Berrazeq M, Drissi M. Molecular typing and characterization of TEM, SHV, CTX-M, and CMY-2  $\beta$ -lactamases in *Enterobacter cloacae* strains isolated in patients and their hospital environment in the west of Algeria. *Med Mal Infect*. 2014; 44: 146–152. <https://doi.org/10.1016/j.medmal.2014.01.008> PMID: 24731757
40. Harada K, Arima S, Niina A, Kataoka Y, Takahashi T. Characterization of *Pseudomonas aeruginosa* isolates from dogs and cats in Japan: current status of antimicrobial resistance and prevailing resistance mechanisms. *Microbiol Immunol*. 2012; 56, 123–127. <https://doi.org/10.1111/j.1348-0421.2011.00416.x> PMID: 22188523
41. Harada K, Nakai Y, Kataoka Y. Mechanisms of resistance to cephalosporin and emergence of O25b-ST131 clone harboring CTX-M-27  $\beta$ -lactamase in extraintestinal pathogenic *Escherichia coli* from dogs and cats in Japan. *Microbiol Immunol*. 2012; 56, 480–485. <https://doi.org/10.1111/j.1348-0421.2012.00463.x> PMID: 22486529
42. Hayakawa K, Miyoshi-Akiyama T, Kirikae T, Nagamatsu M, Shimada K, Mezaki K, et al. Molecular and epidemiological characterization of IMP-type metallo  $\beta$ -lactamase-producing *Enterobacter cloacae* in a large tertiary care hospital in Japan. *Antimicrob Agents Chemother*. 2014; 58: 3441–3450. <https://doi.org/10.1128/AAC.02652-13> PMID: 24709261
43. Kim ES, Jeong JY, Jun JB, Choi SH, Lee SO, Kim MN, et al. Prevalence of *aac(6′)-Ib-cr* encoding a ciprofloxacin-modifying enzyme among *Enterobacteriaceae* blood isolates in Korea. *Antimicrob Agents Chemother*. 2009; 53: 2643–2645. <https://doi.org/10.1128/AAC.01534-08> PMID: 19289526
44. Huang S, Dai W, Sun S, Zhang X, Zhang L. Prevalence of plasmid-mediated quinolone resistance and aminoglycoside resistance determinants among carbapenem non-susceptible *Enterobacter cloacae*. *PLoS One* 2012; 7: e47636. <https://doi.org/10.1371/journal.pone.0047636> PMID: 23110085
45. Dalben M, Varkulja G, Basso M, Krebs VL, Gibelli MA, van der Heijden I, et al. Investigation of an outbreak of *Enterobacter cloacae* in a neonatal unit and review of the literature. *J Hosp Infect*. 2008; 70: 7–14. <https://doi.org/10.1016/j.jhin.2008.05.003> PMID: 18632183
